# Supplementary material
Source: publisher site journal article supplement (http://www.degruyter.com/publication/journal_key/IJSL/downloadAsset/IJSL_SLSLC_list_new.pdf)
Supplement: Supplementary file 1 [file IJSL_SLSLC_list_new.pdf]

## Small Languages and Small Language Communities

| Article number | Article title                                                                                                                            | Author                                        | IJSL issue number (Year) |
|----------------|------------------------------------------------------------------------------------------------------------------------------------------|-----------------------------------------------|--------------------------|
| 1              | News, notes and comments* (Fryske Akademy)                                                                                               | Nancy C. Dorian                               | 76 (1989)                |
| 2              | News, notes and comments ( <i>América Indígena</i> issues on “ <i>Revitalización de las lenguas indígenas</i> ”)                         | Nancy C. Dorian                               | 78 (1989)                |
| 3              | News, notes and comments (Faroese)                                                                                                       | Nancy C. Dorian                               | 80 (1989)                |
| 4              | News, notes and comments (Alaska Native Language Center 1)                                                                               | Nancy C. Dorian                               | 82 (1990)                |
| 5              | News, notes and comments (Alaska Native Language Center 2)                                                                               | Nancy C. Dorian                               | 86 (1990)                |
| 6              | News, notes and comments (Information sources)                                                                                           | Nancy C. Dorian                               | 87 (1991)                |
| 7              | News, notes and comments (Language death in East Africa: a report on an international symposium)                                         | Matthias Brenzinger<br>Gerrit J. Dimmendaal   | 88 (1991)                |
| 8              | News, notes and comments (MERCATOR Guide to Organizations providing information on lesser used languages)                                | Nancy C. Dorian                               | 93 (1992)                |
| 9              | News, notes and comments (The small languages of Sakhalin)                                                                               | Tjeerd de Graaf                               | 94 (1992)                |
| 10             | News, notes and comments (Tiwi)                                                                                                          | Nancy C. Dorian                               | 95 (1992)                |
| 11             | Language and educational policy in the North: status and prospectus report on the Eskimo-Aleut languages from an international symposium | Roy D. Iutzi-Mitchell<br>Nelson H. H. Graburn | 99 (1993)                |
| 12             | Catalan in Perpignan: results from a questionnaire study                                                                                 | Dawn Marley                                   | 100/101 (1993)           |
| 13             | The graphicization of a small-group language: a case study of Okó                                                                        | Efurosibina Adegbija                          | 102 (1993)               |
| 14             | The 15th International Congress of Linguists and the Endangered Languages Project                                                        | Nancy C. Dorian                               | 103 (1993)               |
| 15             | Scholarly seminar on the codification of the Rusyn language                                                                              | Paul Robert Magocsi<br>Joshua A. Fishman      | 104 (1993)               |
| 16             | The Sorbs between support and suppression                                                                                                | Madlena Norberg                               | 107 (1994)               |
| 17             | Blaže Koneski: in memoriam                                                                                                               | Victor A. Friedman                            | 108 (1994)               |
| 18             | Hawaiian language revitalization and immersion education                                                                                 | Eric Kapono                                   | 112 (1995)               |

|    |                                                                                                                                                                         |                                          |            |
|----|-------------------------------------------------------------------------------------------------------------------------------------------------------------------------|------------------------------------------|------------|
| 19 | Code switching in caretaker speech and bilingual competence in a native village of Northern Quebec                                                                      | Lynn Drapeau                             | 113 (1995) |
| 20 | Sharing expertise and experience in support of small languages                                                                                                          | Nancy C. Dorian                          | 114 (1995) |
| 21 | The practice of preservation: views from linguists working with language renewal. A report on a session of the 1993 meeting of The American Anthropological Association | Joseph Tomei                             | 115 (1995) |
| 22 | Language contact and language restructuring: a case study of tribal languages in Central India                                                                          | Anvita Abbi                              | 116 (1995) |
| 23 | Endangered languages: current issues and future prospects                                                                                                               | Lenore A. Grenoble                       | 118 (1996) |
| 24 | Transnational flows and the language identity of a small nation: the case of Slovenia                                                                                   | Lindsay J. Whaley<br>Zdravko Mlinar      | 119 (1996) |
| 25 | Survival of endangered languages: the California master-apprentice program                                                                                              | Leanne Hinton                            | 123 (1997) |
| 26 | Arvanitika: the long Hellenic centuries of an Albanian variety                                                                                                          | Hans-Jürgen Sasse                        | 134 (1998) |
| 27 | An Ethiopian language on the verge of extinction: K'emant, a preliminary sociolinguistic survey                                                                         | Zelealem Leyew                           | 134 (1998) |
| 28 | The gradual death of the Berber language in Tunisia                                                                                                                     | John Battenburg                          | 137 (1999) |
| 29 | Language revivalism and revitalization in Pacific and Asian areas                                                                                                       | Stephen A. Wurm                          | 137 (1999) |
| 30 | <i>Raidió na Life</i> : innovations in the use of media for Language revitalization                                                                                     | Colleen Cotter                           | 140 (1999) |
| 31 | Language preservation vs. language maintenance and revitalization: assessing concepts, approaches and implications for the language sciences                            | Luisa Maffi                              | 142 (2000) |
| 32 | What I didn't know about working in an endangered language community: some fieldwork issues                                                                             | Naomi Nagy                               | 144 (2000) |
| 33 | Les langues non-étatiques d'Europe: relevé géopolitique et démographique                                                                                                | Roland Breton                            | 145 (2001) |
| 34 | Using the telephone as a community language center                                                                                                                      | Alice Taff                               | 150 (2001) |
| 35 | Language documentation and maintenance programs for Moluccan languages in the Netherlands                                                                               | Margaret Florey<br>Aone Van Engelenhoven | 151 (2001) |

|    |                                                                                                                         |                                                  |                |
|----|-------------------------------------------------------------------------------------------------------------------------|--------------------------------------------------|----------------|
| 36 | Culture and language revitalization, maintenance and development in Mexico: the Nahua Alto Balsas communities           | José Antonio Flores Farfán                       | 152 (2001)     |
| 37 | A collaborative model for preparing indigenous curators of a heritage language                                          | N. Louanna Furbee<br>Lori A. Stanley             | 154 (2002)     |
| 38 | Why make books for people who don't read? A perspective on documentation of an endangered language from Solomon Islands | Angela Terrill                                   | 155/156 (2002) |
| 39 | Phonetic/phonological variation and language contraction                                                                | Bruce Connell                                    | 157 (2002)     |
| 40 | Use of web pages for endangered languages                                                                               | William J. Poser                                 | 158 (2002)     |
| 41 | Lóvaia: an East Timorese language on the verge of extinction                                                            | John Hajek<br>Nikolaus Himmelmann<br>John Bowden | 160 (2003)     |
| 42 | Teaching Tariana, an endangered language from Northwest Amazonia                                                        | Alexandra Y. Aikhenvald                          | 161 (2003)     |
| 43 | Levels of contact, islands of use: Tawahka in the Honduran Mosquitia                                                    | David R. Margolin                                | 163 (2003)     |
| 44 | Tourism and small-language persistence in a Panamanian Creole village                                                   | Peter Snow                                       | 166 (2004)     |
| 45 | Eulogizing a language: the Ngarnka experience                                                                           | Rob Pensalfini                                   | 168 (2004)     |
| 46 | Mali Baining perspectives on language and culture stress                                                                | Tonya N. Stebbins                                | 169 (2004)     |
| 47 | Neoliberalism and minority language planning in the Highlands and Islands of Scotland                                   | Emily McEwan-Fujita                              | 171 (2005)     |
| 48 | Tlingit language immersion retreats: creating new language habitat for the 21st century                                 | D. Roy Mitchell, IV                              | 172 (2005)     |
| 49 | Minority languages between nationalism and new localism: the case of Italy                                              | Silvia Dal Negro                                 | 174 (2005)     |
| 50 | Can a language of a million speakers be endangered? Language shift and apathy among Northern Khmer speakers in Thailand | Peter Vail                                       | 178 (2006)     |
| 51 | Language and religion: a case study of two Ambonese communities                                                         | Simon Musgrave<br>Michael C. Ewing               | 179 (2006)     |
| 52 | The Southern Saami language in Svahken Sijte                                                                            | Jon Todal                                        | 180 (2006)     |
| 53 | Language maintenance and shift in Sudan: the case of migrant ethnic groups in Khartoum                                  | Abdel Rahim Hamid<br>Mugaddam                    | 181 (2006)     |

|    |                                                                                                                                        |                                                                                                                                    |                   |
|----|----------------------------------------------------------------------------------------------------------------------------------------|------------------------------------------------------------------------------------------------------------------------------------|-------------------|
| 54 | Small languages and school. The case of Catalonia and the Basque Country                                                               | Ángel Huguet                                                                                                                       | 182 (2006)        |
| 55 | Language endangerment in Nigeria: perspectives on Akoko languages of the southwest                                                     | Solomon O. Oyetade                                                                                                                 | 184 (2007)        |
| 56 | Does the number of speakers of a language determine its fate?                                                                          | Andoni Barreña<br>Esti Amorrrortu<br>Ane Ortega<br>Belen Urang<br>Esti Izagirre<br>Itziar Idiazabal                                | 186 (2007)        |
| 57 | Ideologies of public and private language use in Tlaxcala, Mexico                                                                      | Jacqueline Messing                                                                                                                 | 187/188<br>(2007) |
| 58 | Retrospective insight: reflections on the specialist's role in developing an Arapaho language assessment protocol                      | Pamela Joan Innes                                                                                                                  | 190 (2008)        |
| 59 | Community collaborations: best practices for North American indigenous language documentation                                          | Susan D. Penfield<br>Angelina Serratos<br>Benjamin V. Tucker<br>Amelia Flores<br>Gilford Harper<br>Johnny Hill Jr.<br>Nora Vasquez | 191 (2008)        |
| 60 | L'Alguer (Alghero), a Catalan linguistic enclave In Sardinia                                                                           | Joan A. Argenter                                                                                                                   | 193/194<br>(2008) |
| 61 | The straw that broke the camel's back: language shift in the Upper Necaxa Valley of Mexico                                             | Yvonne Lam                                                                                                                         | 195 (2009)        |
| 62 | Revitalization in a scattered language community: problems and methods from the perspective of Mutsun language revitalization          | Natasha Warner<br>Quirina Luna<br>Lynnika Butler<br>Heather van Volkinburg                                                         | 198 (2009)        |
| 63 | Is there an educational advantage to speaking Irish? An investigation of the relationship between education and ability to speak Irish | Iarfhlaith Watson<br>Màire Nic Ghiolla<br>Phàdraig                                                                                 | 199 (2009)        |
| 64 | Ethnic-racial reclassification and language revitalization among the Shiwilu from Peruvian Amazonia                                    | Pilar Valenzuela                                                                                                                   | 202 (2010)        |
| 65 | Nahuatl among Jehovah's Witnesses of Hueyapan, Morelos: a case of spontaneous revitalization                                           | Magnus Pharaos Hansen                                                                                                              | 203 (2010)        |
| 66 | Small languages, education and citizenship: the paradoxical case of Luxembourgish                                                      | Kristine Horner<br>Jean-Jacques Weber                                                                                              | 205 (2010)        |
| 67 | When support for language revitalization is not enough: the end of indigenous language classes at Warm Springs Elementary School       | Erin Flynn Haynes                                                                                                                  | 209 (2011)        |
| 68 | The Albanian dialects in southern Italy: a tenuous survival                                                                            | Carmela Perta                                                                                                                      | 210 (2011)        |
| 69 | Keeping the fire alive: a decade of language revitalization in Mexico                                                                  | José Antonio Flores<br>Farfán                                                                                                      | 212 (2011)        |

|    |                                                                                                                                               |                                                      |            |
|----|-----------------------------------------------------------------------------------------------------------------------------------------------|------------------------------------------------------|------------|
| 70 | The Small Languages and Small Language Communities section: twenty-two years on                                                               | Nancy C. Dorian                                      | 213 (2012) |
| 71 | Damned if you do and damned if you don't: language choice in the research interview                                                           | Iolo Madoc-Jones<br>Odette Parry                     | 215 (2012) |
| 72 | Continuing and shifting multilingualism in an émigré situation: language use and attitudes amongst Iraqi Chaldeans and Assyrians in Melbourne | Jim Hlavac                                           | 217 (2012) |
| 73 | Language ideology and language maintenance: the case of Sardinia                                                                              | Stefania Tufi                                        | 219 (2013) |
| 74 | Shifting language attitudes in north-west Amazonia                                                                                            | Alexandra Y. Aikhenvald                              | 222 (2013) |
| 75 | The Basque Street Survey: two decades of assessing language use in public spaces                                                              | Olatz Altuna<br>Jacqueline Urla                      | 224 (2013) |
| 76 | The Bajjika language and speech community                                                                                                     | Abhishek Kumar Kashyap                               | 227 (2014) |
| 77 | Înîhiyawîtwâw 'they are speaking Cree': Cree language use and issues in northern Alberta, Canada                                              | Clinton N. Westman<br>Christine Schreyer             | 230 (2014) |
| 78 | Indexing authenticity: The linguistic landscape of an Irish tourist town                                                                      | Mairead Moriarty                                     | 232 (2015) |
| 79 | An ethnography of the standardization reform: A case of policy-making in the context of the Upper Perené Arawak community of Peru             | Elena Mihás                                          | 234 (2015) |
| 80 | Language and identity in the context of conflict: the case of ethnolinguistic communities in South Darfur State                               | Dhahawi S. A. Garri<br>Abdel Rahim Hamid<br>Mugaddam | 235 (2015) |
| 81 | What practices and ideologies support small-scale multilingualism? A case study of Waruwî Community, northern Australia                       | Ruth Singer<br>Salome Harris                         | 241 (2016) |
| 82 | Language management and language managers: who are the Irish language managers in Breacbhaile?                                                | Laoise Ní Dhúda                                      | 245 (2017) |
| 83 | Rap music in minority languages in secondary education: a case study of Catalan rap                                                           | Cristina Aliagas<br>Marín                            | 248 (2017) |
| 84 | Transition as a focus within language maintenance research: Wellington Iraqi refugees as an example                                           | Ayman Tawalbeh                                       | 251 (2018) |
| 85 | Tracing the 'Extinctness' of Tai Ahom: Issues of Language Loss and Death                                                                      | Dipima Buragohain                                    | 252 (2018) |
| 86 | Language ideologies and identities in Kurdish heritage language classrooms in London                                                          | Birgül Yilmaz                                        | 253 (2018) |

\* The original rubric of this section was "Small Languages and Small Language Communities: News, notes and comments". The first ten articles appeared under that rubric, many of them short pieces on the topics entered in parentheses, written as start-up contributions by the Assistant Editor.
